# Supplementary material for: Differential gene expression of immunity and inflammation genes in colorectal cancer using targeted RNA sequencing
Source: PubMed Central journal article supplement (PMC10586664; doi:10.3389/fonc.2023.1206482), 2023-10-05
Supplement: DataSheet_1.pdf [file DataSheet_1.pdf]

# report\_coca\_FC\_\_March15\_2023.R

mg

2023-03-15

## indexplot, avHK

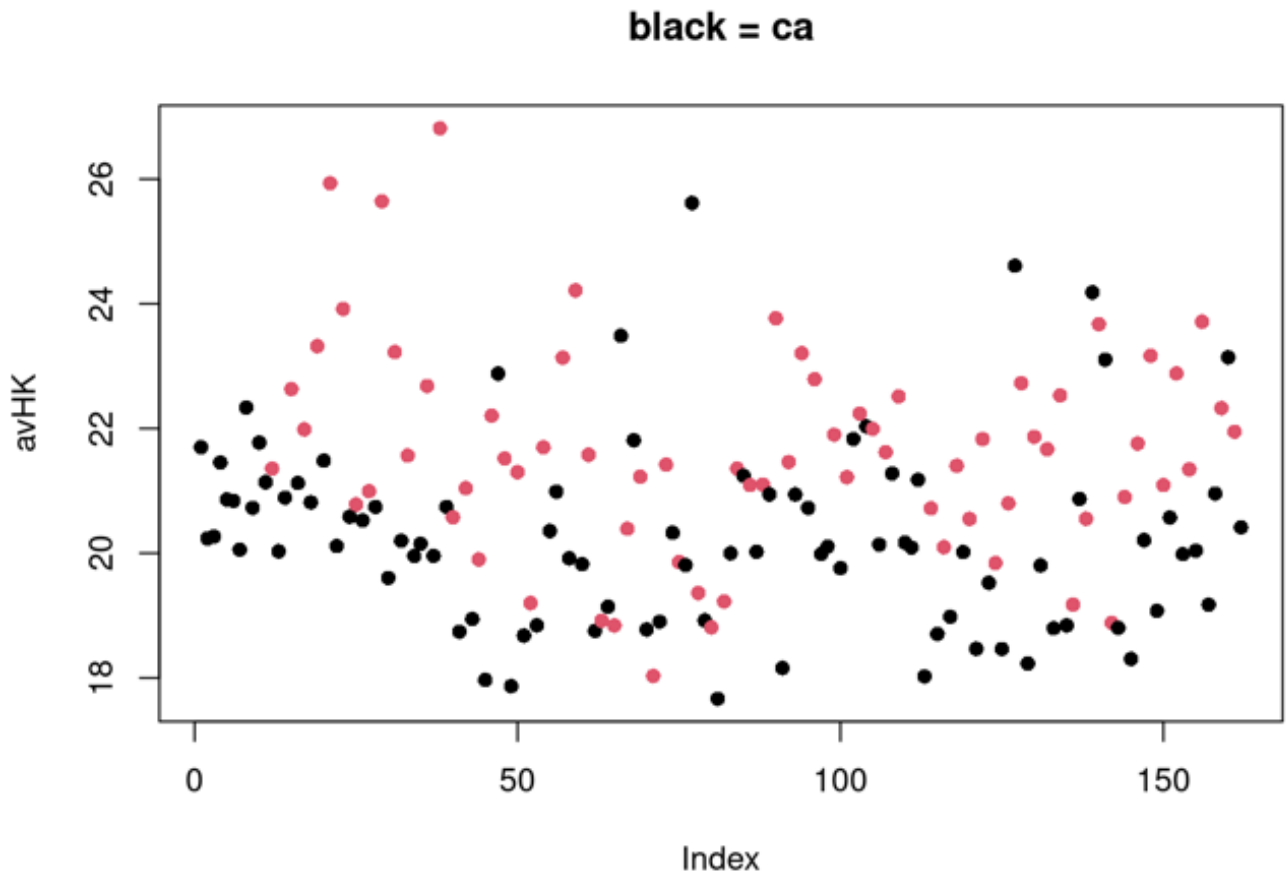

ca vs co

EDA of logFC

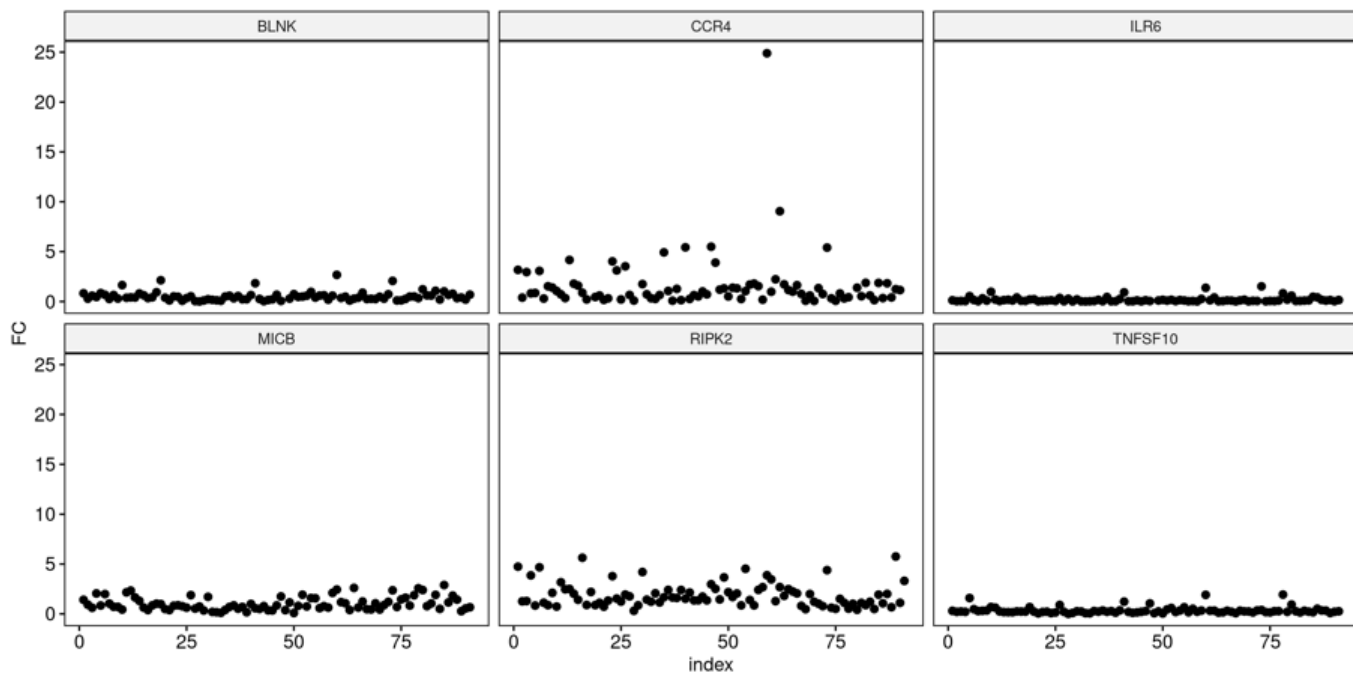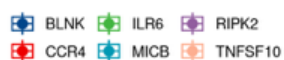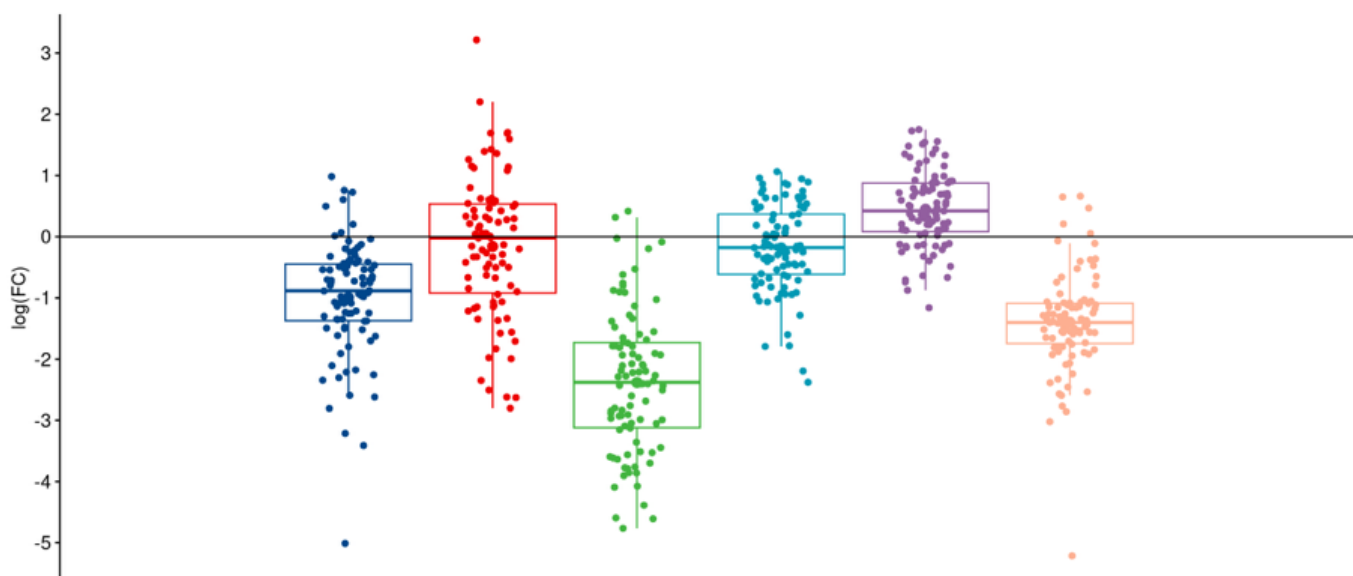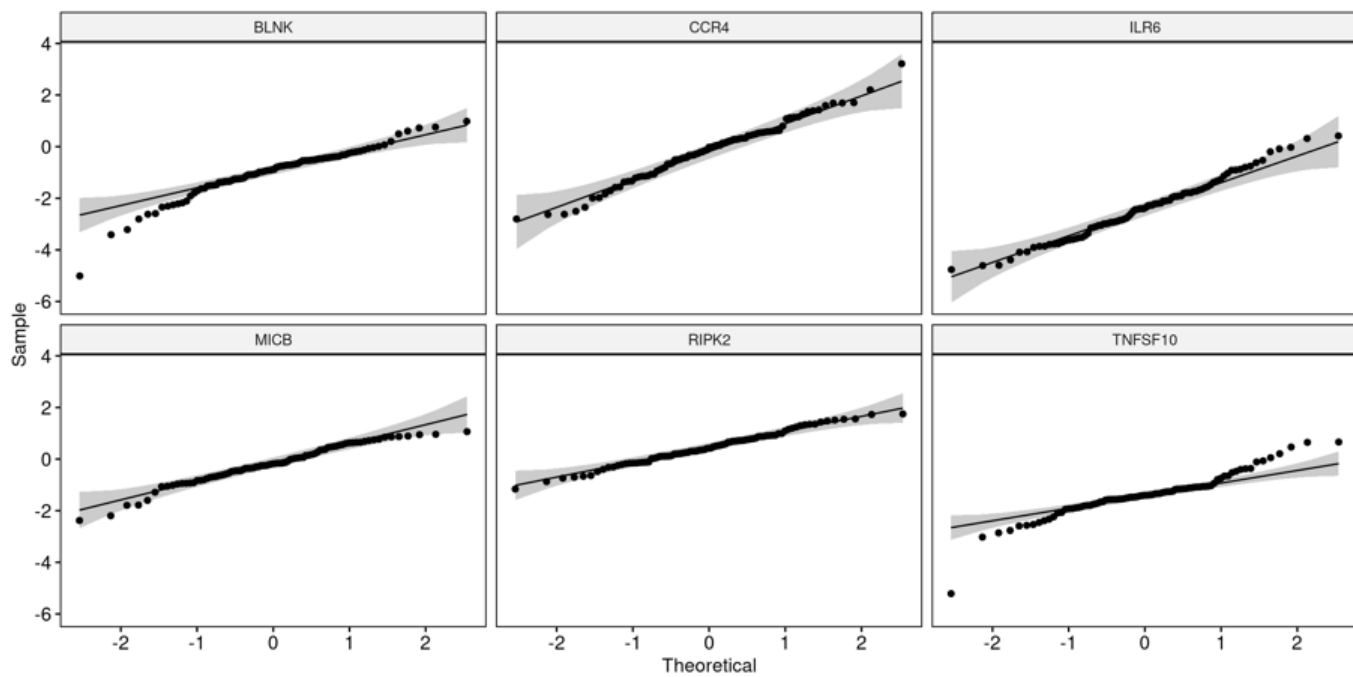

# Descriptive stat of log(FC)

| Characteristic | N = 91 <sup>1</sup>  |
|----------------|----------------------|
| BLNK           | -0.88 (-1.37, -0.45) |
| Unknown        | 1                    |
| CCR4           | -0.02 (-0.92, 0.54)  |
| Unknown        | 4                    |
| ILR6           | -2.38 (-3.12, -1.73) |
| Unknown        | 1                    |
| MICB           | -0.18 (-0.61, 0.37)  |
| RIPK2          | 0.42 (0.08, 0.88)    |
| TNFSF10        | -1.40 (-1.74, -1.09) |

<sup>1</sup>Median (IQR)

## Wilcoxon test; H0: mean log(FC) = 0

| gene    | p.value                   |
|---------|---------------------------|
| BLNK    | 0.00000000000000920252470 |
| CCR4    | 0.2776524937021490613276  |
| ILR6    | 0.0000000000000002398323  |
| MICB    | 0.0437421753748651678806  |
| RIPK2   | 0.0000000110847009135223  |
| TNFSF10 | 0.0000000000000004239486  |

mts vs primary

EDA of logFC

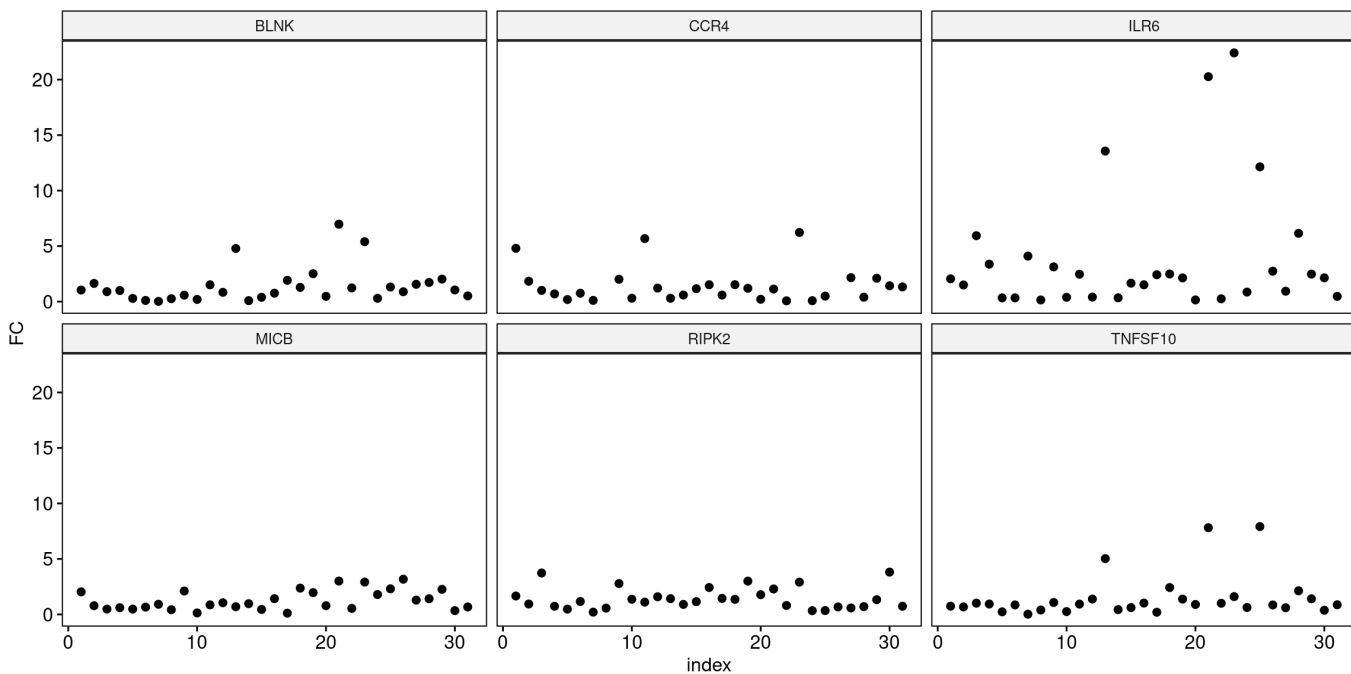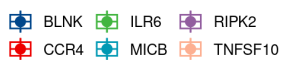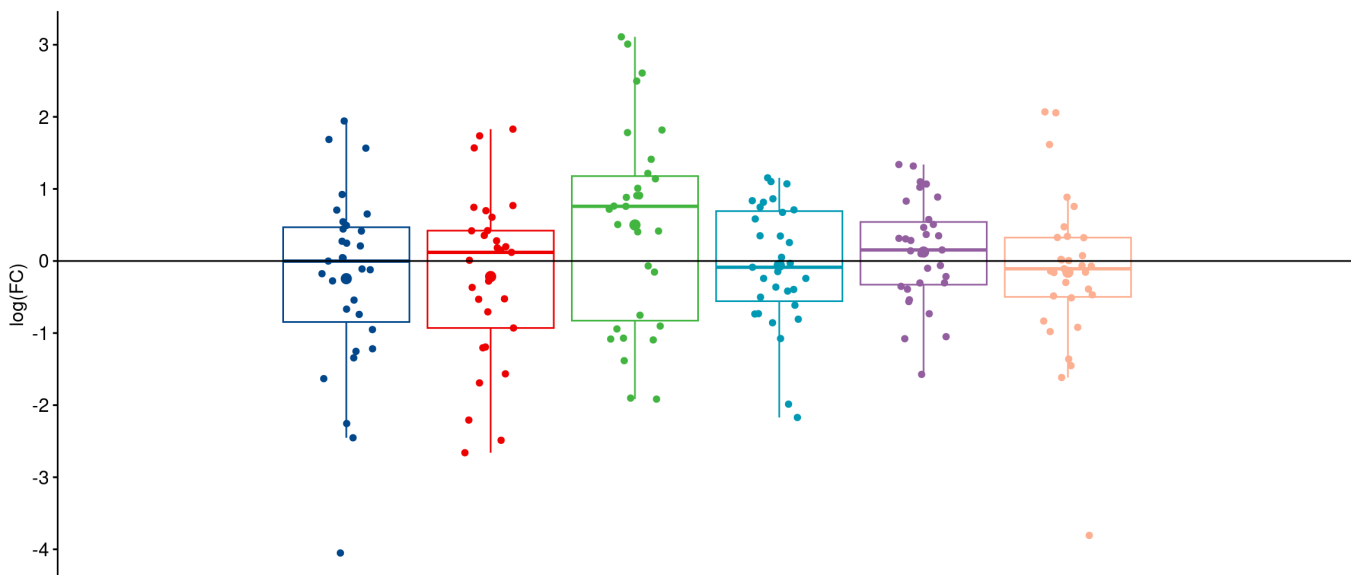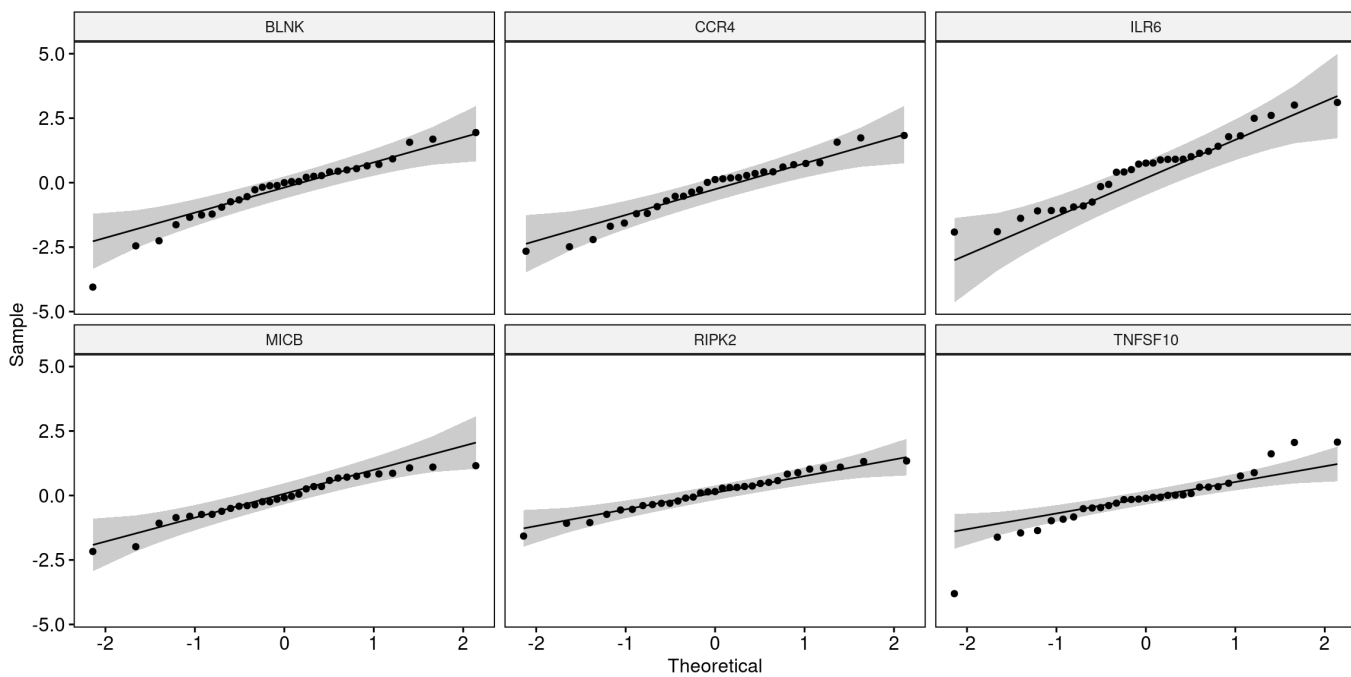

# Descriptive stat of log(FC)

| Characteristic | N = 31 <sup>1</sup> |
|----------------|---------------------|
| BLNK           | 0.00 (-0.85, 0.47)  |
| CCR4           | 0.12 (-0.93, 0.42)  |
| Unknown        | 2                   |
| ILR6           | 0.76 (-0.83, 1.18)  |
| MICB           | -0.09 (-0.56, 0.69) |
| RIPK2          | 0.15 (-0.33, 0.54)  |
| TNFSF10        | -0.11 (-0.50, 0.32) |

<sup>1</sup>Median (IQR)

## Wilcoxon test; H0: mean log(FC) = 0

| gene    | p.value   |
|---------|-----------|
| BLNK    | 0.5167645 |
| CCR4    | 0.5503523 |
| ILR6    | 0.1066251 |
| MICB    | 0.9768866 |
| RIPK2   | 0.3175717 |
| TNFSF10 | 0.3175717 |

## KRAS+ vs KRAS-

## EDA of logFC

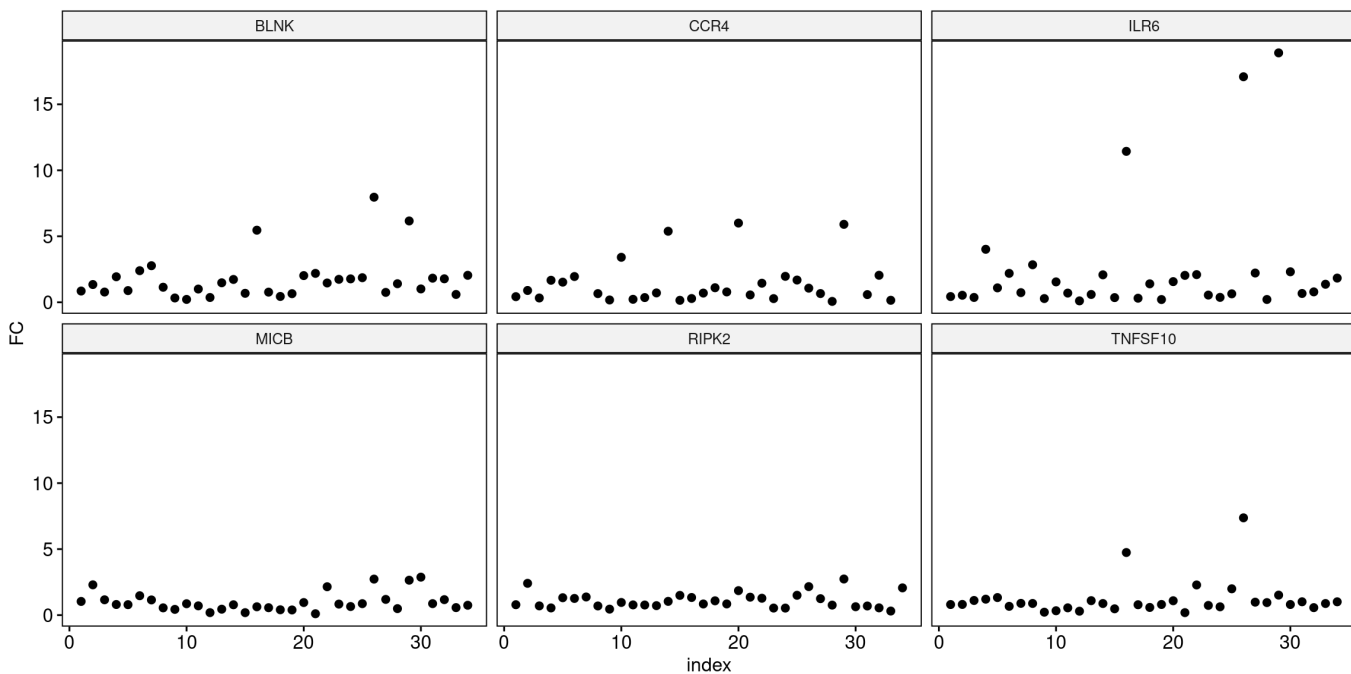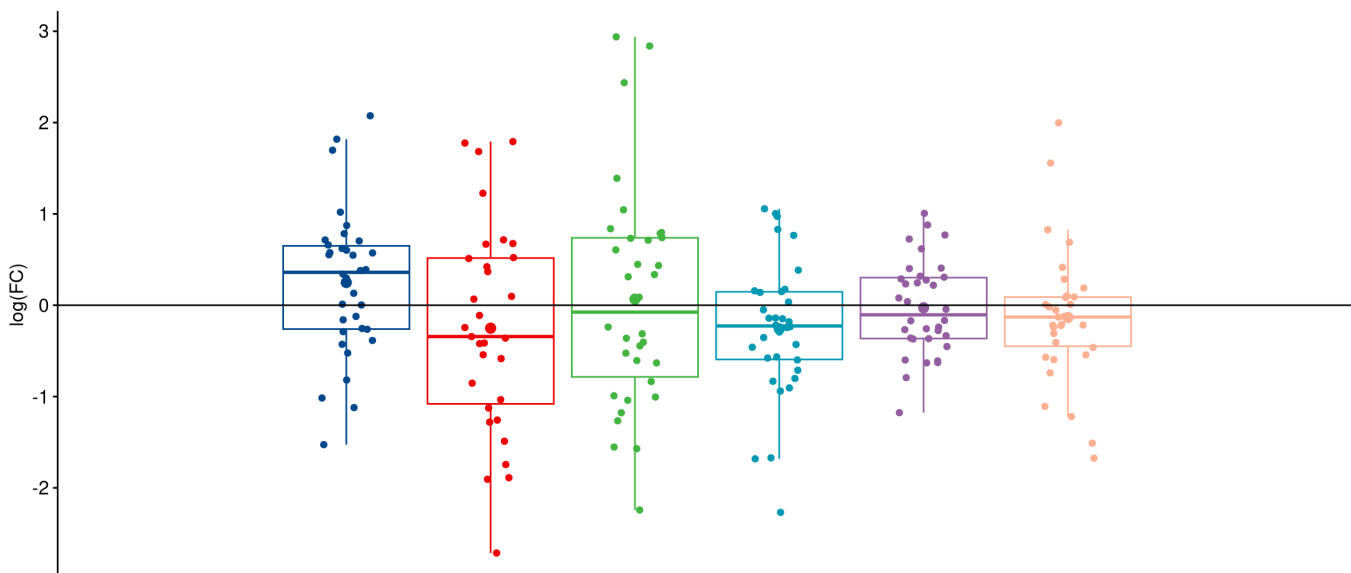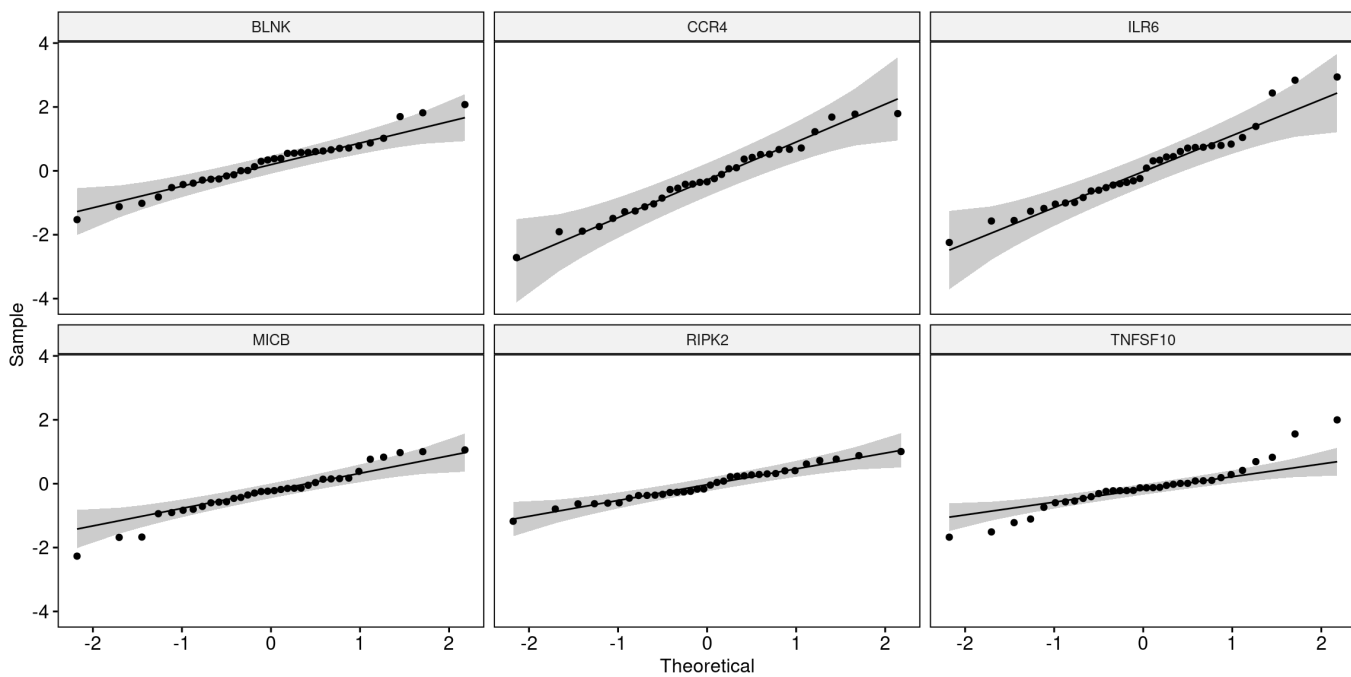

# Descriptive stat of log(FC)

| Characteristic | N = 34 <sup>1</sup> |
|----------------|---------------------|
| BLNK           | 0.36 (-0.26, 0.65)  |
| CCR4           | -0.34 (-1.08, 0.52) |
| Unknown        | 3                   |
| ILR6           | -0.08 (-0.78, 0.74) |
| MICB           | -0.23 (-0.59, 0.15) |
| RIPK2          | -0.10 (-0.36, 0.30) |
| TNFSF10        | -0.13 (-0.45, 0.09) |

<sup>1</sup>Median (IQR)

## Wilcoxon test; H0: mean log(FC) = 0

| gene    | p.value    |
|---------|------------|
| BLNK    | 0.05476904 |
| CCR4    | 0.28106469 |
| ILR6    | 1.00000000 |
| MICB    | 0.05043983 |
| RIPK2   | 0.72295671 |
| TNFSF10 | 0.07234450 |
